# Supplementary material
Source: publisher site journal article supplement (https://www.dovepress.com/article/252913)
Supplement: Supplementary file 1 [file get_supplementary_file.php]

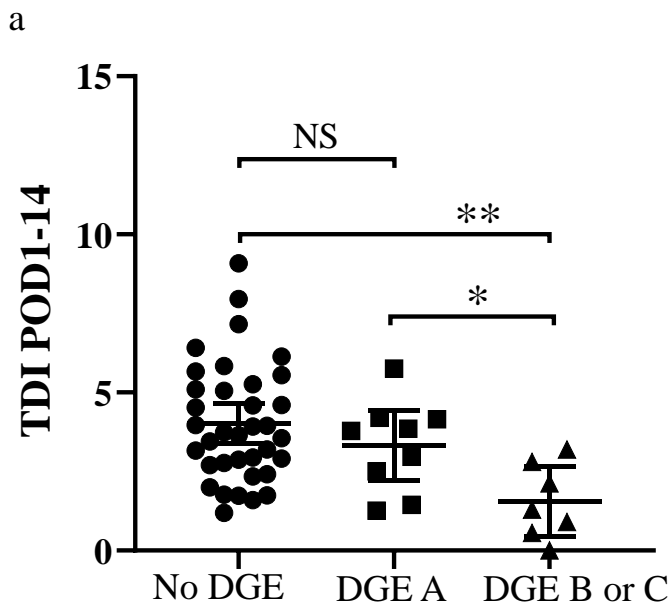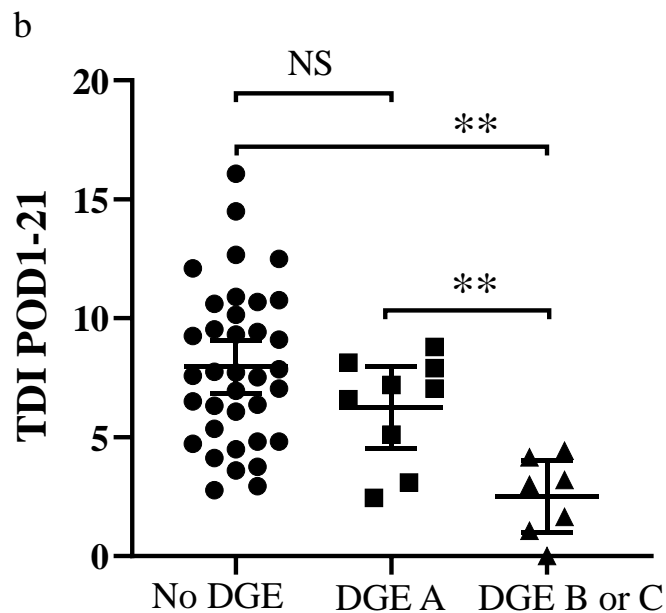

**Supplemental Figure 1.** Distribution of TDI values among all patients by DGE grade. (a) TDI values from POD 1 to 14. (b) TDI values from POD 1 to 21. Patients without DGE are indicated by black round dots, patients with grade A DGE are indicated by black squares, and patients with grade B or C DGE are indicated by black triangles. Bars indicate medians (95% CI). \*  $p < 0.05$ , \*\*  $p < 0.01$ . TDI: total dietary intake, CI: confidence interval, DGE: delayed gastric emptying, RKT: *rikkunshito*, POD: postoperative day, NS: not statistically significant.

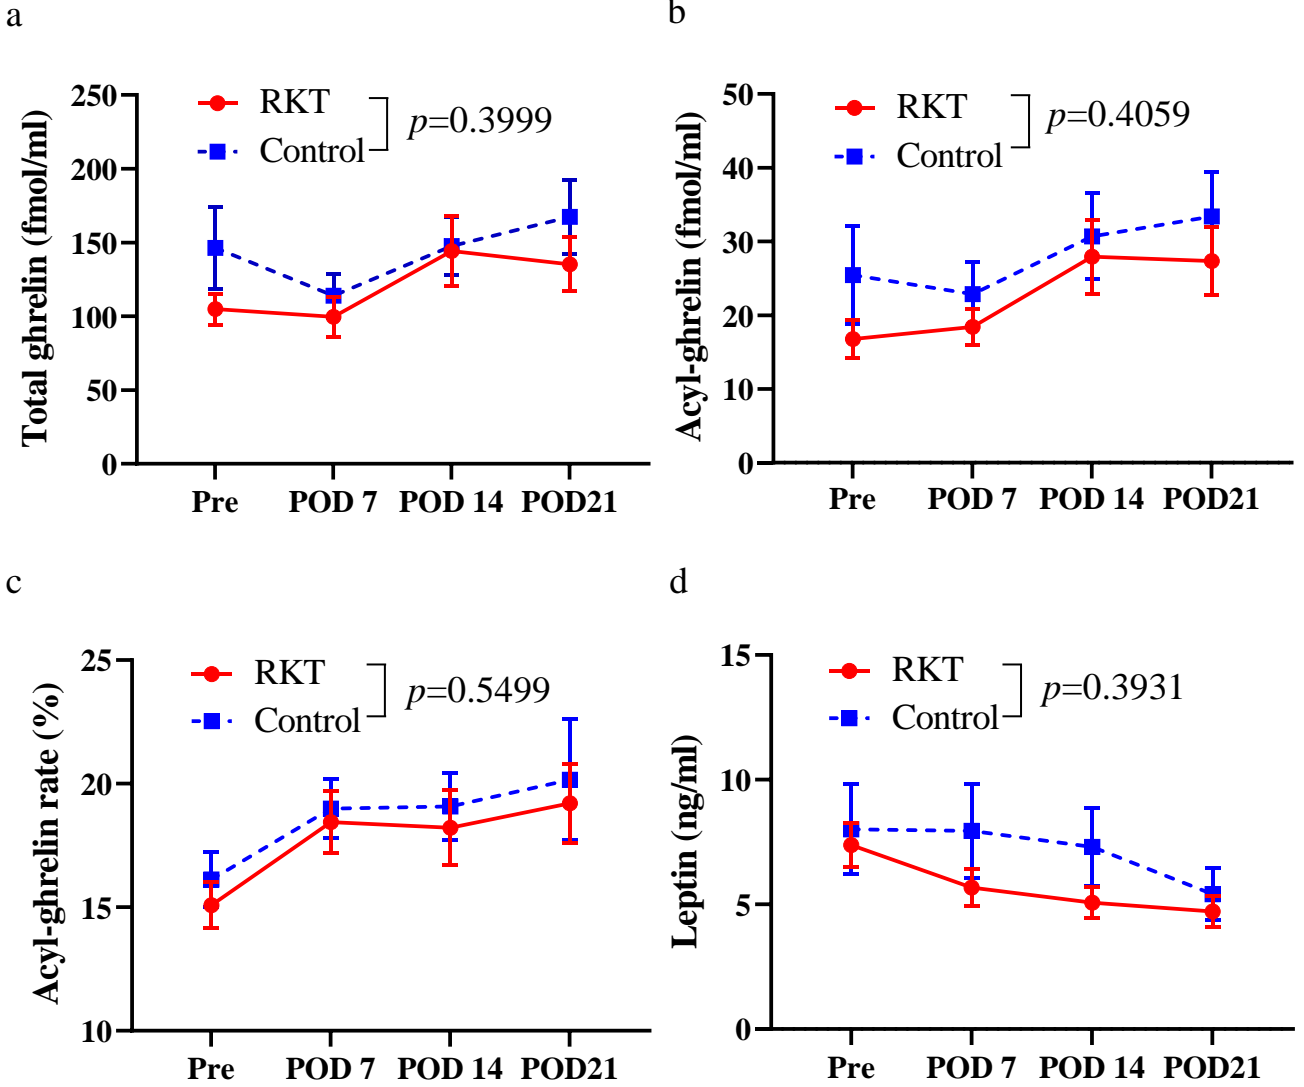

**Supplemental Figure 2.** Comparison of hormone levels between the RKT and control groups

RKT: *rikkunshito*, Pre: preoperative value, POD: postoperative day.

**Supplemental Table 1.** Short-term postoperative outcomes stratified by BMI

| <b>BMI &lt;22 kg/m<sup>2</sup></b>     | RKT group (n=13)  | Control group (n=13) | <i>p</i> |
|----------------------------------------|-------------------|----------------------|----------|
| All patients with DGE                  | 4 (30.8%)         | 6 (46.2%)            | 0.6882   |
| Grade A DGE                            | 2 (15.4%)         | 4 (30.8%)            | 0.6447   |
| Grade B DGE                            | 1 (7.7%)          | 1 (7.7%)             | >0.9999  |
| Grade C DGE                            | 1 (7.7%)          | 1 (7.7%)             | >0.9999  |
| Grade B+C DGE                          | 2 (15.4%)         | 2 (15.4%)            | >0.9999  |
| TDI (POD 1–14)                         | 3.16 (1.19-9.08)  | 3.79 (0.9-6.41)      | 0.4483   |
| TDI (POD 1–21)                         | 6.32 (2.77-16.08) | 7.58 (1.65-12.50)    | 0.8798   |
| Duration of parenteral nutrition, days | 21 (9-47)         | 23 (13-40)           | 0.9096   |
| Duration of hospital stay, days        | 28 (16-48)        | 28 (17-41)           | 0.9095   |
| <b>BMI ≥22 kg/m<sup>2</sup></b>        | RKT group (n=13)  | Control group (n=13) | <i>p</i> |
| All patients with DGE                  | 4 (30.8%)         | 2 (15.4%)            | 0.6882   |
| Grade A DGE                            | 2 (15.4%)         | 1 (7.7%)             | 0.6447   |
| Grade B DGE                            | 1 (7.7%)          | 0                    | >0.9999  |
| Grade C DGE                            | 1 (7.7%)          | 1 (7.7%)             | >0.9999  |
| Grade B+C DGE                          | 2 (15.4%)         | 1 (7.7%)             | >0.9999  |
| TDI (POD 1–14)                         | 2.81 (0.56-7.16)  | 3.74 (0-7.95)        | 0.2226   |
| TDI (POD 1–21)                         | 6.51 (1.06-12.66) | 7.72 (0-14.50)       | 0.5446   |
| Duration of parenteral nutrition, days | 20 (12-41)        | 19 (11-43)           | 0.6043   |
| Duration of hospital stay, days        | 27 (21-48)        | 29 (20-44)           | 0.8496   |

BMI: body mass index, DGE: delayed gastric emptying, TDI: total dietary intake, POD: postoperative day, RKT: *rikkunshito*.

**Supplemental Table 2.** Short-term postoperative outcomes by procedure type

| <b>PPPD</b>                            | RKT group (n=16)  | Control group (n=18) | <i>p</i> |
|----------------------------------------|-------------------|----------------------|----------|
| All patients with DGE                  | 5 (31.3%)         | 6 (33.3%)            | >0.9999  |
| Grade A DGE                            | 2 (12.5%)         | 3 (16.7%)            | >0.9999  |
| Grade B DGE                            | 1 (6.3%)          | 1 (5.6%)             | >0.9999  |
| Grade C DGE                            | 2 (12.5%)         | 2 (11.1%)            | >0.9999  |
| Grade B+C DGE                          | 3 (18.8%)         | 3 (16.7%)            | >0.9999  |
| TDI (POD 1–14)                         | 3.06 (1.19-9.08)  | 3.87 (0-6.13)        | 0.4898   |
| TDI (POD 1–21)                         | 6.55 (2.94-16.08) | 7.80 (0-12.10)       | 0.8782   |
| Duration of parenteral nutrition, days | 18.5 (11-47)      | 18.5 (11-43)         | 0.7523   |
| Duration of hospital stay, days        | 27 (21-47)        | 28 (17-44)           | 0.713    |
| <b>SSPPD</b>                           | RKT group (n=10)  | Control group (n=8)  | <i>p</i> |
| All patients with DGE                  | 3 (30.0%)         | 2 (25.0%)            | >0.9999  |
| Grade A DGE                            | 2 (20.0%)         | 2 (25.0%)            | >0.9999  |
| Grade B DGE                            | 1 (10.0%)         | 0                    | >0.9999  |
| Grade C DGE                            | 0                 | 0                    | >0.9999  |
| Grade B+C DGE                          | 1 (10.0%)         | 0                    | >0.9999  |
| TDI (POD 1–14)                         | 2.17 (0.56-7.16)  | 3.34 (1.45-7.95)     | 0.1728   |
| TDI (POD 1–21)                         | 5.08 (1.06-12.66) | 5.73 (2.45-14.50)    | 0.6334   |
| Duration of parenteral nutrition, days | 23.5 (12-41)      | 26 (12-40)           | 0.7449   |
| Duration of hospital stay, days        | 32.5 (21-48)      | 36.5 (22-41)         | 0.3941   |

PPPD: pylorus-preserving pancreaticoduodenectomy, SSPPD: subtotal stomach-preserving pancreaticoduodenectomy, DGE: delayed gastric emptying, TDI: total dietary intake, POD: postoperative day, RKT: *rikunshito*.
